# Supplementary material for: pH-Responsive nanoparticles based on ibuprofen prodrug as drug carriers for inhibition of primary tumor growth and metastasis
Source: Royal Society of Chemistry journal article supplement (doi:10.1039/c7tb01288h), 2017-01-01
Supplement: c7tb01288h1.pdf [file c7tb01288h1.pdf]

## Supplementary Information for

### pH-responsive nanoparticle based on Ibuprofen prodrug as drug carrier for inhibition of primary tumor growth and metastasis

Zhi Zeng,<sup>a</sup> Zeliang Wei,<sup>b</sup> Limei Ma,<sup>a</sup> Yao Xu,<sup>a</sup> Zhihua Xing,<sup>a</sup> Hai Niu,<sup>bc</sup> Haibo Wang,<sup>\*d</sup> and Wen Huang<sup>\*ab</sup>

<sup>a</sup> Laboratory of Ethnopharmacology, Regenerative Medicine Research Center, West China Hospita, West China Medical School, Sichuan University, Chengdu 610041, China. \*E-mail: huangwen@scu.edu.cn

<sup>b</sup> Institute for Nanobiomedical Technology and Membrane Biology, Sichuan University, Chengdu 610041, China. \*E-mail: niuhai@scu.edu.cn; Fax: +86-028-85164075; Tel: +86-028-85164073

<sup>c</sup> College of Mathematics, Sichuan University, Chengdu, 610045, China

<sup>d</sup> Textile Institute, College of Light Industry, Textile and Food Engineering, Sichuan University, Chengdu, 610065, China

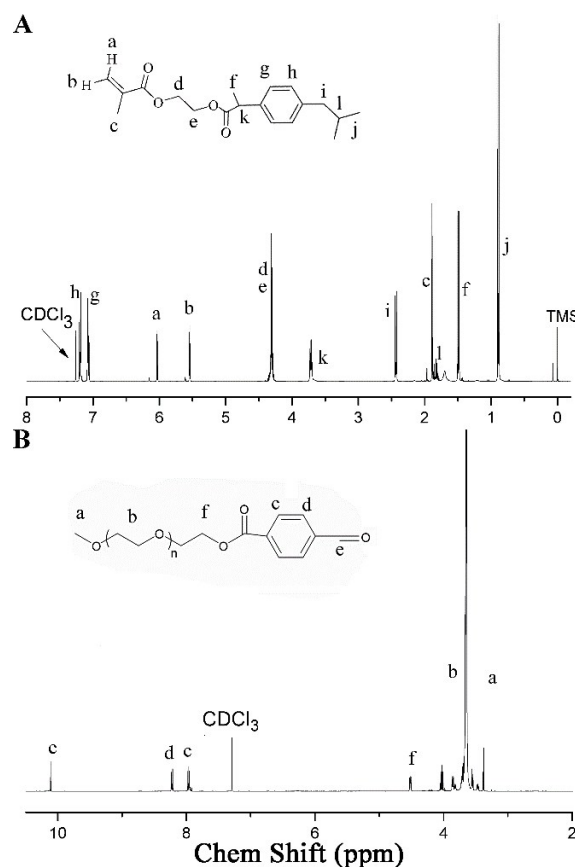

**Figure S1** <sup>1</sup>H-NMR spectra of HEI (A) and PEG-CBA (B) in CDCl<sub>3</sub>.

**Table S1** Characterization data of the polymers

|                         | <i>M<sub>n</sub></i> (GPC) <sup>a</sup> | PDI  |
|-------------------------|-----------------------------------------|------|
| MPEG-PHEI <sub>5</sub>  | 3714                                    | 1.15 |
| MPEG-PHEI <sub>10</sub> | 6229                                    | 1.24 |

<sup>a</sup> measured by GPC (THF, PS standards).

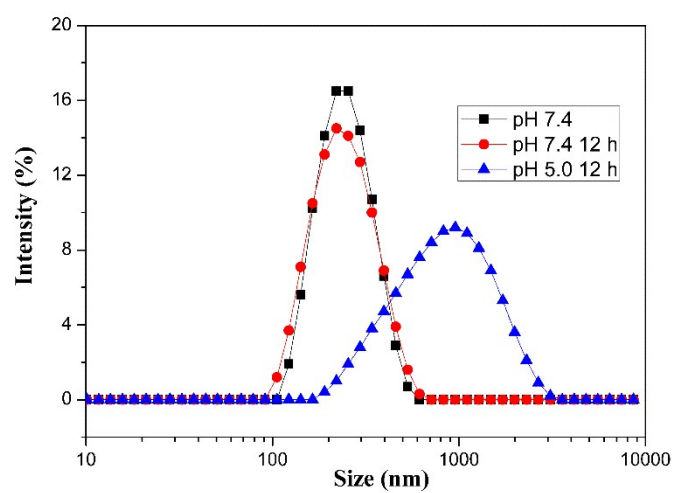

**Figure S2** Size distribution of blank nanoparticles in physiological and acidic conditions (37 °C, pH 7.4 and 5.0).

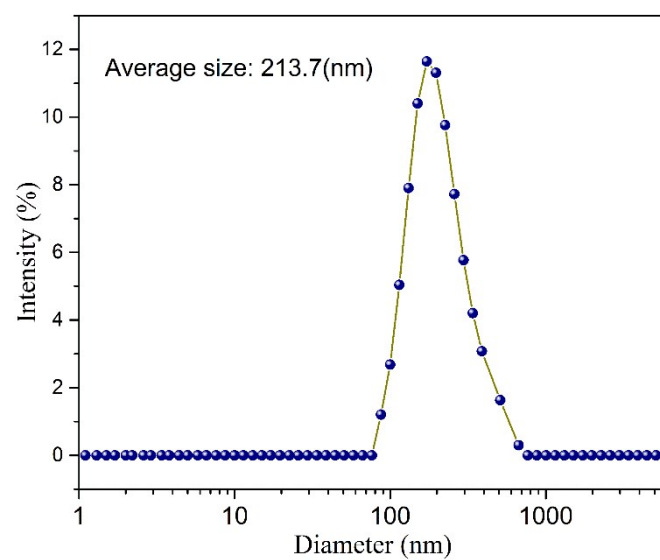

**Figure S3** Size distribution of DOX/NPs.

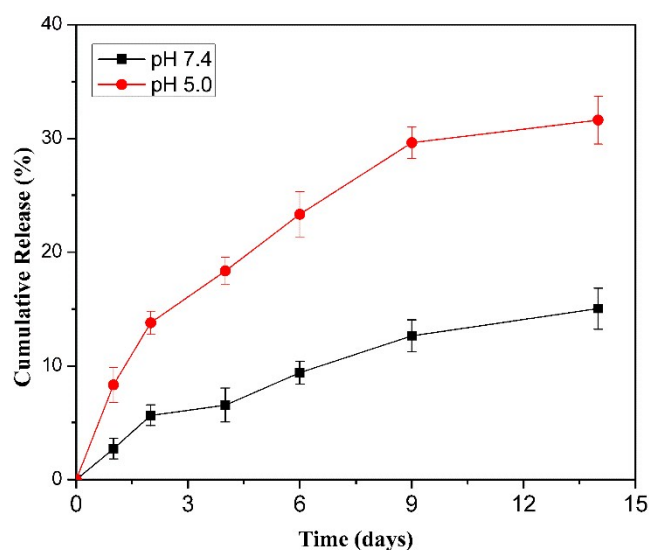

**Figure S4** Ibuprofen release profiles of MPEG-PHEI in physiological and acidic conditions (37 °C, pH 7.4 and 5.0).

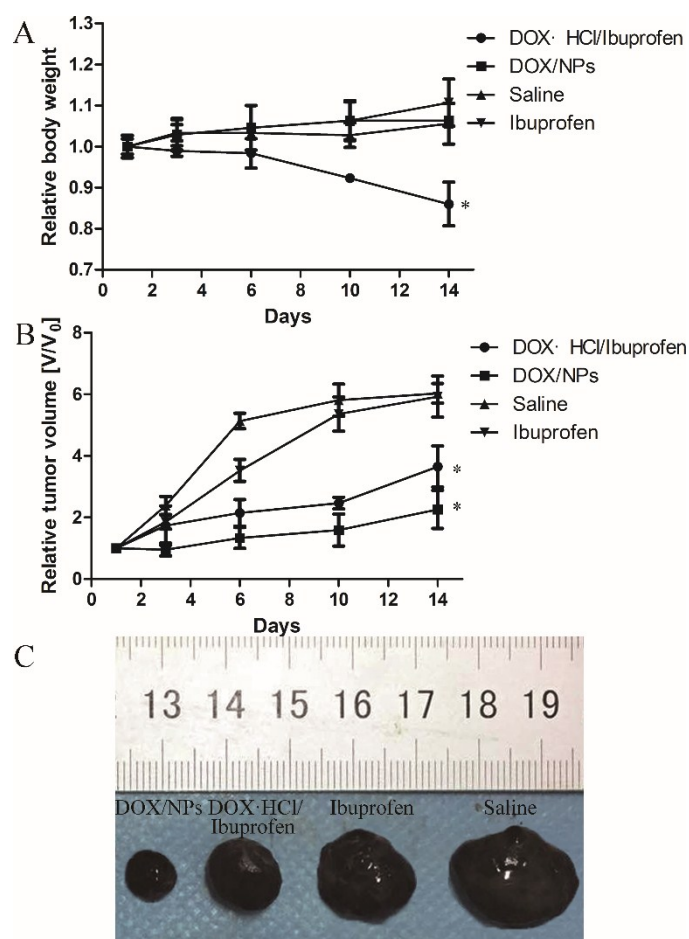

**Figure S5** *In vivo* antitumor efficacy of DOX/NPs compared to ibuprofen, as well as the combination of DOX and ibuprofen. (A) Body weights of mice, (B) tumor growth curves, (C) tumor morphologies after the mice were sacrificed. Error bars indicate SD (n = 6). \*P < 0.01, treated group versus saline group. The scale bar is 500  $\mu$ m.
